# Supplementary material for: The C-terminal domain of connexin43 modulates cartilage structure via chondrocyte phenotypic changes
Source: PubMed Central journal article supplement (PMC5341963; doi:10.18632/oncotarget.12197), 2016-09-22
Supplement: oncotarget-07-73055-s001.pdf [file oncotarget-07-73055-s001.pdf]

## The C-terminal domain of connexin43 modulates cartilage structure via chondrocyte phenotypic changes

### Supplementary Materials

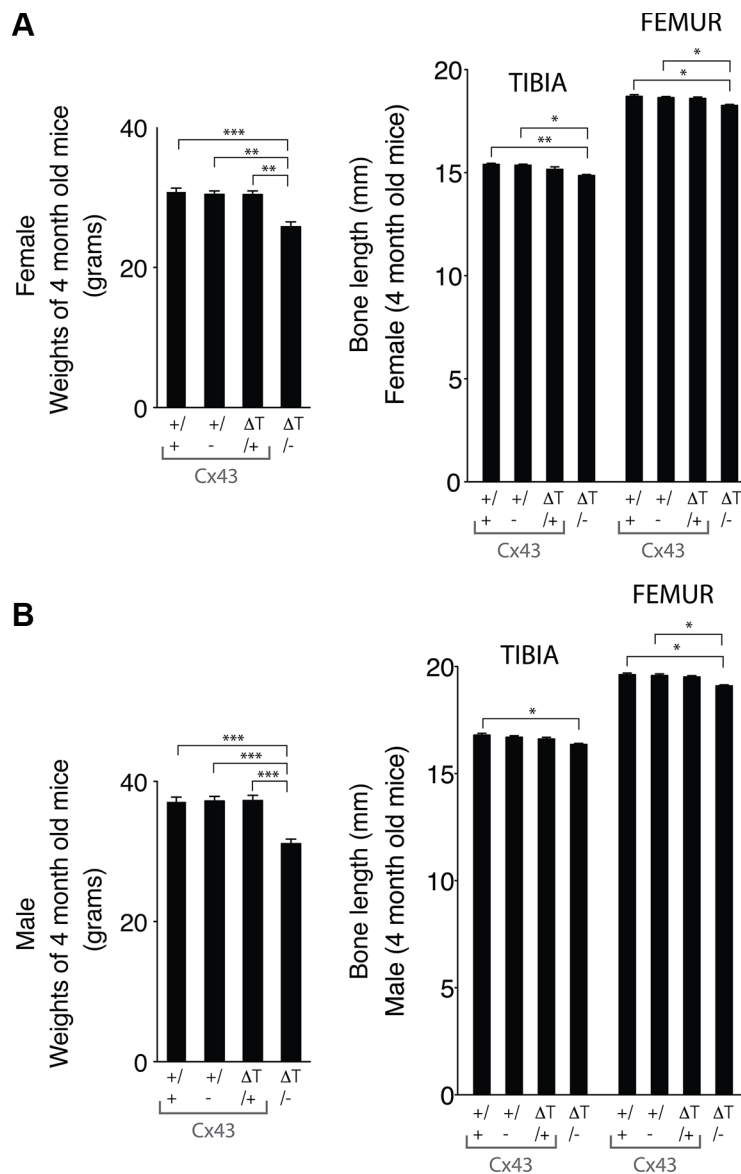

**Supplementary Figure S1: CTD-truncated mice (four month old mice) have shortened bone length.** (A and B) Truncated Cx43 genotype mice were smaller than the other genotypes from the same litters. The difference in weight was related with a smaller body without lack of macroscopic fat at visual inspection. The length of each bone was measured using a digital calliper. Mean  $\pm$  S.E.M. ( $n = 5$ ). \* $p < 0.05$ ; \*\* $p < 0.01$ ; \*\*\* $p < 0.001$ .

Merge (Cx43 & DAPI)

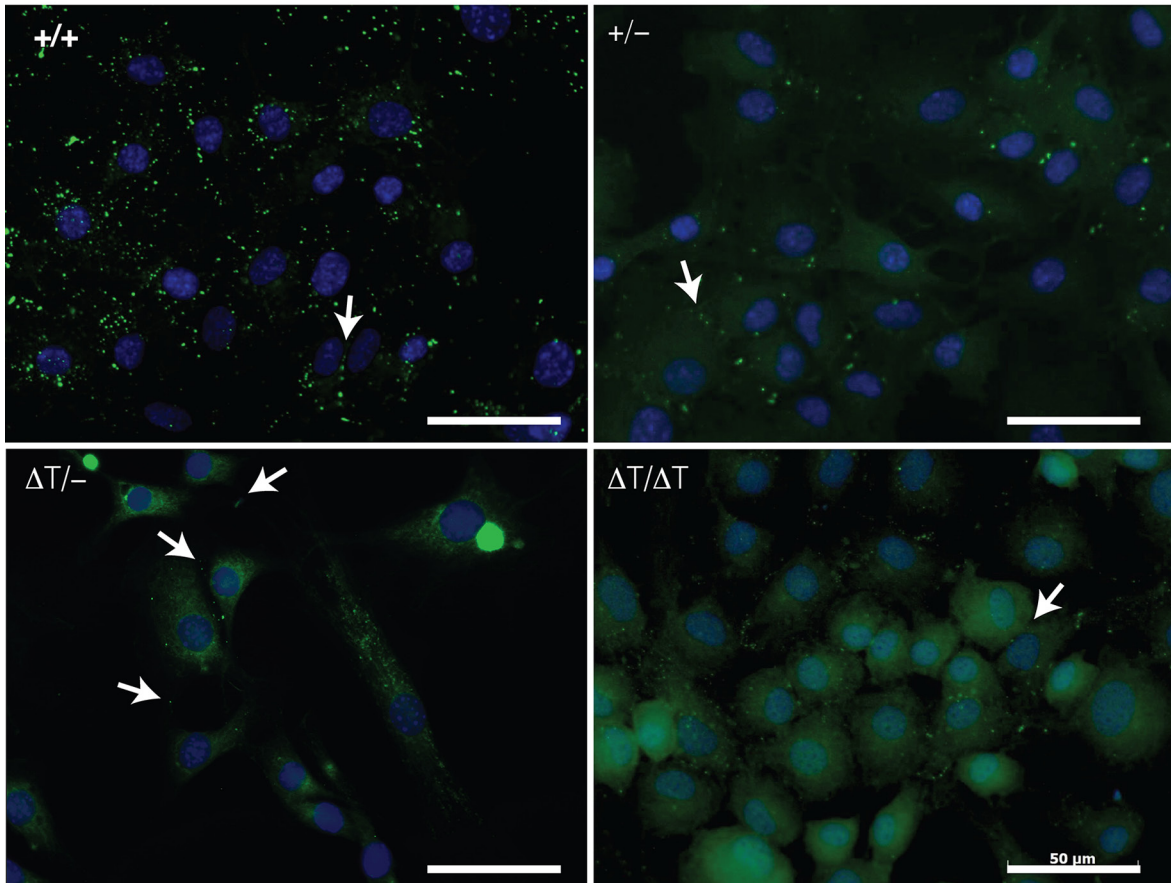

**Supplementary Figure S2: Cx43 cellular localization in primary chondrocytes of wild type and truncated Cx43 genotypes (cells isolated from cartilage of 2–4 day old pups) was determined by immunofluorescence.** White arrows indicate connexin plaque staining at points of cell-cell contact. Scale bar represents 50 μm.
